# Supplementary material for: High-Pressure Orthorhombic Ferromagnesite as a Potential Deep-Mantle Carbon Carrier
Source: PubMed Central journal article supplement (PMC4284511; doi:10.1038/srep07640), 2015-01-06

Supplementary Material

## **High-Pressure Orthorhombic Ferromagnesite as a Potential Deep-Mantle Carbon Carrier**

Jin Liu<sup>a</sup>, Jung-Fu Lin<sup>a,b</sup>, and Vitali B. Prakapenka<sup>c</sup>

<sup>a</sup>Department of Geological Sciences, Jackson School of Geosciences, The University of Texas at Austin, Austin, TX 78712, USA

<sup>b</sup>Center for High Pressure Science and Technology Advanced Research (HPSTAR), Shanghai 201203, People's Republic of China

<sup>c</sup>Consortium for Advanced Radiation Sources, The University of Chicago, Chicago, IL 60637, USA

## Supplementary Text

**Indexing the powder diffraction patterns.** The dichotomy method<sup>1</sup> has been used for indexing the powder diffraction patterns of the high-pressure phase siderite II (Table S3). It consists of finding the unit-cell parameters from the  $d$ -spacing values available in a diffraction pattern<sup>1</sup>. Literature data on magnesite II (ref. 2) and magnesiosiderite II (ref. 3) have also been re-indexed using the current orthorhombic siderite II structural model (Tables S5 and S6). The derived unit cell parameters are consistent within the high-pressure phase of the magnesite-siderite system.

**Equation of state parameters.** The third-order Birch-Murnaghan equation of state<sup>4</sup> was used to fit to the pressure-volume data of the siderite I and II, respectively, at 300 K:

$$P = \frac{3K_{0T}}{2} \left[ \left( \frac{V_{0T}}{V} \right)^{\frac{7}{3}} - \left( \frac{V_{0T}}{V} \right)^{\frac{5}{3}} \right] \left\{ 1 + \frac{3}{4} (K'_{0T} - 4) \left[ \left( \frac{V_{0T}}{V} \right)^{\frac{2}{3}} - 1 \right] \right\}, \quad [\text{S1}]$$

where  $P$  is pressure,  $V$  is the unit-cell volume,  $K_{0T}$  is the isothermal bulk modulus at ambient pressure and  $K'_{0T}$  is its pressure derivative, and  $0T$  denotes ambient pressure and a given temperature, respectively. The derived incompressibility for siderite is consistent with the reported value for siderite (see Table S8).

## Supplementary References

1. Boultif, A. & Louer, D. Powder pattern indexing with the dichotomy method. *J. Appl. Cryst.* **37**, 724-731, doi:10.1107/S0021889804014876 (2004).
2. Isshiki, M. *et al.* Stability of magnesite and its high-pressure form in the lowermost mantle. *Nature* **427**, 60-63 (2004).
3. Boulard, E. *et al.* New host for carbon in the deep Earth. *Proc. Natl. Acad. Sci. USA* **108**, 5184-5187 (2011).
4. Birch, F. Finite strain isotherm and velocities for single-crystal and polycrystalline NaCl at high pressures and 300 K. *J. Geophys. Res.* **83**, 1257-1268, doi:10.1029/JB083iB03p01257 (1978).
5. Fei, Y. *et al.* Toward an internally consistent pressure scale. *Proc. Natl. Acad. Sci. USA* **104**, 9182-9186, doi:10.1073/pnas.0609013104 (2007).
6. Skorodumova, N. V., Belonoshko, A. B., Huang, L., Ahuja, R. & Johansson, B. Stability of the MgCO<sub>3</sub> structures under lower mantle conditions. *Am. Mineral.* **90**, 1008-1011, doi:10.2138/am.2005.1685 (2005).
7. Oganov, A. R., Ono, S., Ma, Y., Glass, C. W. & Garcia, A. Novel high-pressure structures of MgCO<sub>3</sub>, CaCO<sub>3</sub> and CO<sub>2</sub> and their role in Earth's lower mantle. *Earth Planet. Sci. Lett.* **273**, 38-47, doi:10.1016/j.epsl.2008.06.005 (2008).
8. Oganov, A. R., Glass, C. W. & Ono, S. High-pressure phases of CaCO<sub>3</sub>: Crystal structure prediction and experiment. *Earth Planet. Sci. Lett.* **241**, 95-103, doi:10.1016/j.epsl.2005.10.014 (2006).

9. Merrill, L. & Bassett, W. A. The crystal structure of  $\text{CaCO}_3(\text{II})$ , a high-pressure metastable phase of calcium carbonate. *Acta Crystallogr. Sect. B* **31**, 343-349, doi:10.1107/S0567740875002774 (1975).
10. Arapan, S. & Ahuja, R. High-pressure phase transformations in carbonates. *Phys. Rev. B* **82**, 184115 (2010).
11. Ono, S., Kikegawa, T., Ohishi, Y. & Tsuchiya, J. Post-aragonite phase transformation in  $\text{CaCO}_3$  at 40 GPa. *Am. Mineral.* **90**, 667-671, doi:10.2138/am.2005.1610 (2005).
12. Ono, S. High-pressure phase transformation in  $\text{MnCO}_3$ : a synchrotron XRD study. *Mineral. Mag.* **71**, 105-111, doi:10.1180/minmag.2007.071.1.105 (2007).
13. Merlini, M., Hanfland, M. & Crichton, W. A.  $\text{CaCO}_3$ -III and  $\text{CaCO}_3$ -VI, high-pressure polymorphs of calcite: Possible host structures for carbon in the Earth's mantle. *Earth Planet. Sci. Lett.* **333–334**, 265-271, doi:10.1016/j.epsl.2012.04.036 (2012).
14. Ono, S., Kikegawa, T. & Ohishi, Y. High-pressure transition of  $\text{CaCO}_3$ . *Am. Mineral.* **92**, 1246-1249, doi:10.2138/am.2007.2649 (2007).

## Supplementary Figure Captions

**Fig. S1.** Representative X-ray diffraction patterns of siderite I in compression up to 120 GPa at 300 K. Gold (Au) was used as the primary pressure calibrant, while NaCl (B1 or B2 structure) was served as the secondary pressure calibrant as well as the thermal insulator and pressure medium<sup>5</sup>. Miller indices (hkl) of siderite I are labeled as I(hkl). HS and LS states are labeled to illustrate the splitting of the diffraction peaks across the spin transition of siderite I at 42 GPa and 300 K. The wavelength of the monochromatic X-ray beam was 0.3344 Å.

**Fig. S2.** Representative X-ray diffraction patterns of siderite I and II phases before, during, and after laser heating at 115 GPa. Gold (Au) was used as the primary pressure calibrant, while NaCl (B1 or B2 structure) was served as the secondary pressure calibrant as well as the thermal insulator and pressure medium<sup>5</sup>. Miller indices (hkl) of siderite I and II are labeled as I(hkl) and II(hkl), respectively. The wavelength of the monochromatic X-ray beam was 0.3344 Å.

**Fig. S3.** Representative SEM-EDX images of the high  $P$ - $T$  quenched  $\text{FeCO}_3$  sample. The sample was heated to 2200 K at 90 GPa and then eventually decompressed and recovered at ambient conditions for the analyses. (A) Back-scattered electron image of the recovered sample. The dashed circles show the representative laser-heated spot where siderite II was observed in the XRD patterns. Individual SEM-EDX mappings: (B) Oxygen; (C) Carbon; (D) Iron.

**Table S1.** Experimental conditions for siderite at high pressures and temperatures. Data points were compiled using the experimental sequence. Ne medium was used in Samples #1st and #2nd, whereas NaCl medium was used in Sample #3rd. The high-pressure siderite II phase can be reproduced and observed in all three samples at high pressure-temperature conditions.

| Sample | P (GPa) | T (K) | Phase(s) | Sample | P (GPa) | T (K) | Phase(s) |
|--------|---------|-------|----------|--------|---------|-------|----------|
| 1st    | 0       | 300   | I        | 2nd    | 69.0    | 1200  | I        |
| 1st    | 5.5     | 300   | I        | 2nd    | 69.0    | 1400  | I+II     |
| 1st    | 8.5     | 300   | I        | 2nd    | 69.0    | 1600  | I+II     |
| 1st    | 11.2    | 300   | I        | 2nd    | 69.0    | 1800  | I+II     |
| 1st    | 15.7    | 300   | I        | 2nd    | 69.0    | 1900  | I+II     |
| 1st    | 20.0    | 300   | I        | 2nd    | 69.0    | 2000  | I+II     |
| 1st    | 24.2    | 300   | I        | 2nd    | 69.0    | 2200  | II       |
| 1st    | 28.5    | 300   | I        | 2nd    | 69.0    | 2400  | II       |
| 1st    | 34.1    | 300   | I        | 2nd    | 73.5    | 300   | I        |
| 1st    | 34.1    | 1800  | I        | 2nd    | 76.4    | 300   | I        |
| 1st    | 34.1    | 2000  | I        | 2nd    | 79.2    | 300   | I        |
| 1st    | 34.1    | 2300  | I        | 2nd    | 79.2    | 1200  | I        |
| 1st    | 38.8    | 300   | I        | 2nd    | 79.2    | 1400  | I+II     |
| 1st    | 42.0    | 300   | I        | 2nd    | 79.2    | 1600  | I+II     |
| 1st    | 44.2    | 2450  | I        | 2nd    | 79.2    | 1800  | I+II     |
| 1st    | 44.2    | 2200  | I        | 2nd    | 79.2    | 2000  | II       |
| 1st    | 44.2    | 2000  | I        | 2nd    | 81.3    | 300   | I        |
| 1st    | 44.2    | 1800  | I        | 2nd    | 84.4    | 300   | I        |
| 1st    | 44.2    | 1400  | I        | 2nd    | 90.0    | 300   | I        |
| 1st    | 44.2    | 1200  | I        | 2nd    | 90.0    | 1200  | I        |
| 1st    | 44.2    | 300   | I        | 2nd    | 90.0    | 1300  | I        |
| 1st    | 48.7    | 300   | I        | 2nd    | 90.0    | 1450  | I+II     |
| 1st    | 58.9    | 300   | I        | 2nd    | 90.0    | 1600  | I+II     |
| 1st    | 51.9    | 300   | I        | 2nd    | 90.0    | 1800  | I+II     |
| 1st    | 51.9    | 1000  | I        | 2nd    | 90.0    | 2000  | II       |
| 1st    | 51.9    | 1200  | I        | 2nd    | 90.0    | 2100  | II       |
| 1st    | 51.9    | 1400  | I+II     | 2nd    | 90.0    | 2200  | II       |
| 1st    | 51.9    | 1600  | I+II     | 3rd    | 93.8    | 300   | I        |
| 1st    | 51.9    | 1800  | I+II     | 3rd    | 99.4    | 300   | I        |
| 1st    | 51.9    | 2000  | I+II     | 3rd    | 99.4    | 1100  | I        |
| 1st    | 51.9    | 2200  | I+II     | 3rd    | 99.4    | 1350  | I        |
| 1st    | 56.3    | 300   | I        | 3rd    | 99.4    | 1600  | I+II     |
| 1st    | 56.3    | 1100  | I        | 3rd    | 99.4    | 1800  | I+II     |
| 1st    | 56.3    | 1400  | I+II     | 3rd    | 99.4    | 2000  | II       |
| 1st    | 56.3    | 1600  | I+II     | 3rd    | 103.9   | 300   | I        |
| 1st    | 56.3    | 1800  | I+II     | 3rd    | 109.1   | 300   | I        |
| 1st    | 56.3    | 2000  | I+II     | 3rd    | 115.2   | 1200  | I        |

|     |      |      |      |     |       |      |      |
|-----|------|------|------|-----|-------|------|------|
| 1st | 56.3 | 2100 | I+II | 3rd | 115.2 | 1400 | I    |
| 1st | 56.3 | 2300 | I+II | 3rd | 115.2 | 300  | I    |
| 1st | 56.3 | 2400 | I+II | 3rd | 115.2 | 1600 | I+II |
| 2nd | 54.6 | 300  | I    | 3rd | 115.2 | 1800 | I+II |
| 2nd | 61.7 | 300  | I    | 3rd | 115.2 | 2000 | II   |
| 2nd | 65.3 | 300  | I    | 3rd | 115.2 | 2200 | II   |
| 2nd | 69.0 | 300  | I    | 3rd | 119.5 | 300  | I    |
| 2nd | 69.0 | 1000 | I    |     |       |      |      |

---

**Table S2.** Chemical analyses of iron and oxygen contents in the recovered sample from laser heating at 90 GPa and 2200 K. The analyses were conducted using the Environmental Scanning Electron Microscope (Model Quanta 650 FEG) and the energy dispersive spectroscopy (Bruker XFlash Detector 5010) with the electron beam resolution of 2.5 nm at 30 kV.

|           | 1                  | 2                  | 3                  | 4                  | 5                  | 6                  |
|-----------|--------------------|--------------------|--------------------|--------------------|--------------------|--------------------|
| O (at.%)  | 75.6 ( $\pm 5.1$ ) | 75.1 ( $\pm 5.0$ ) | 75.0 ( $\pm 5.0$ ) | 76.1 ( $\pm 4.6$ ) | 75.6 ( $\pm 5.2$ ) | 75.7 ( $\pm 5.5$ ) |
| Fe (at.%) | 24.4 ( $\pm 2.3$ ) | 24.9 ( $\pm 2.3$ ) | 25.0 ( $\pm 2.3$ ) | 23.9 ( $\pm 1.9$ ) | 24.4 ( $\pm 2.3$ ) | 24.3 ( $\pm 2.5$ ) |
| O/Fe      | 3.0 ( $\pm 0.3$ )  | 3.0 ( $\pm 0.3$ )  | 3.0 ( $\pm 0.3$ )  | 3.1 ( $\pm 0.3$ )  | 3.0 ( $\pm 0.3$ )  | 3.1 ( $\pm 0.3$ )  |



**Table S3.** Observed and calculated  $d$  spacings for the siderite II phase at 90 GPa and room temperature. The orthorhombic structure with the formula unit per unit cell ( $Z$ ) of 12 was used for the calculations with representative  $a = 10.9902 (\pm 0.0028) \text{ \AA}$ ,  $b = 6.3405 (\pm 0.0021) \text{ \AA}$ ,  $c = 5.2726 (\pm 0.0009) \text{ \AA}$ , and  $V = 367.4 (\pm 0.3) \text{ \AA}^3$  via the dichotomy method<sup>1</sup>.  $d_{\text{Obs}}$ : observed  $d$  spacings of the X-ray diffraction peaks;  $d_{\text{Calc}}$ : calculated  $d$  spacings;  $d_{\text{Obs}}-d_{\text{Calc}}$ : difference between the observed and calculated  $d$  spacings;  $I_{\text{Obs}}$ : observed intensities of the diffraction peaks that have been scaled to the highest intensity as 100.

| H | K | L | $d_{\text{Obs}} (\text{\AA})$ | $d_{\text{Calc}} (\text{\AA})$ | $d_{\text{Obs}}-d_{\text{Calc}} (\text{\AA})$ | $I_{\text{Obs}}$ |
|---|---|---|-------------------------------|--------------------------------|-----------------------------------------------|------------------|
| 0 | 1 | 0 | 6.3387                        | 6.3405                         | -0.0018                                       | 3                |
| 3 | 0 | 0 | 3.6634                        | 3.6634                         | 0.0001                                        | 21               |
| 2 | 1 | 1 | 3.2638                        | 3.2623                         | 0.0015                                        | 45               |
| 0 | 2 | 0 | 3.1655                        | 3.1702                         | -0.0047                                       | 1                |
| 1 | 0 | 2 | 2.5634                        | 2.5636                         | -0.0002                                       | 14               |
| 3 | 2 | 0 | 2.3959                        | 2.3972                         | -0.0013                                       | 89               |
| 4 | 1 | 1 | 2.2718                        | 2.2744                         | -0.0026                                       | 13               |
| 2 | 1 | 2 | 2.2267                        | 2.2257                         | 0.0010                                        | 43               |
| 3 | 0 | 2 | 2.1388                        | 2.1398                         | -0.0010                                       | 3                |
| 1 | 2 | 2 | 1.9926                        | 1.9934                         | -0.0008                                       | 9                |
| 1 | 3 | 1 | 1.9289                        | 1.9312                         | -0.0023                                       | 4                |
| 2 | 2 | 2 | 1.9004                        | 1.9018                         | -0.0014                                       | 10               |
| 4 | 0 | 2 | 1.9004                        | 1.9023                         | -0.0019                                       | 10               |
| 2 | 3 | 1 | 1.8451                        | 1.8475                         | -0.0024                                       | 4                |
| 4 | 1 | 2 | 1.8229                        | 1.8220                         | 0.0009                                        | 78               |
| 6 | 1 | 0 | 1.7595                        | 1.7597                         | -0.0002                                       | 1                |
| 0 | 1 | 3 | 1.6934                        | 1.6937                         | -0.0003                                       | 100              |
| 4 | 2 | 2 | 1.6315                        | 1.6311                         | 0.0004                                        | 15               |
| 5 | 1 | 2 | 1.6315                        | 1.6314                         | 0.0001                                        | 15               |
| 4 | 3 | 1 | 1.5950                        | 1.5966                         | -0.0016                                       | 34               |
| 2 | 3 | 2 | 1.5794                        | 1.5794                         | 0.0001                                        | 8                |
| 0 | 2 | 3 | 1.5376                        | 1.5371                         | 0.0005                                        | 9                |
| 3 | 1 | 3 | 1.5376                        | 1.5373                         | 0.0003                                        | 9                |
| 7 | 1 | 1 | 1.4650                        | 1.4641                         | 0.0009                                        | 7                |
| 3 | 2 | 3 | 1.4152                        | 1.4171                         | -0.0019                                       | 21               |
| 6 | 3 | 0 | 1.3841                        | 1.3842                         | -0.0001                                       | 1                |
| 0 | 3 | 3 | 1.3516                        | 1.3513                         | 0.0003                                        | 14               |
| 1 | 0 | 4 | 1.3091                        | 1.3088                         | 0.0003                                        | 11               |
| 6 | 0 | 3 | 1.2691                        | 1.2682                         | 0.0009                                        | 1                |
| 2 | 1 | 4 | 1.2563                        | 1.2564                         | -0.0001                                       | 1                |
| 6 | 1 | 3 | 1.2436                        | 1.2435                         | 0.0001                                        | 11               |
| 9 | 0 | 0 | 1.2222                        | 1.2211                         | 0.0011                                        | 6                |

**Table S4.** High-pressure phases of carbonates reported in previous works.

|           | Magnesite-Siderite<br>[(Mg,Fe)CO <sub>3</sub> ]                                                           | Calcite<br>[CaCO <sub>3</sub> ]                       | Aragonite<br>[CaCO <sub>3</sub> ]                 | Rhodochrosite<br>[MnCO <sub>3</sub> ] |
|-----------|-----------------------------------------------------------------------------------------------------------|-------------------------------------------------------|---------------------------------------------------|---------------------------------------|
| Phase I   | $R\bar{3}c$                                                                                               | $R\bar{3}c$                                           | $Pm\bar{c}n$                                      | $R\bar{3}c$                           |
| Phase II  | orthorhombic <sup>2</sup><br>$P2_1/c$ (ref. 3)<br>$C2/c$ (ref. 6)<br>$C2/m$ (ref. 7)<br>$C222_1$ (ref. 8) | $P2_1/c$ (ref. 9)                                     | $Pm\bar{m}n$ (refs. 8,10)<br>$P2_12_12$ (ref. 11) | orthorhombic <sup>12</sup>            |
| Phase III | $Pm\bar{c}n$ (ref. 6)<br>$P2_1$ (ref. 7)                                                                  | $P\bar{1}$ (ref. 13)<br>orthorhombic <sup>13,14</sup> | $C222_1$<br>(refs. 8,10,14)                       |                                       |
| Phase IV  |                                                                                                           |                                                       | $Pm\bar{c}n$ (ref. 10)                            |                                       |

**Table S5.** Observed and calculated  $d$  spacings for magnesite II at 119 GPa and 300 K using the experimental data by Isshiki *et al.*<sup>2</sup>. The orthorhombic structural model gives magnesite II unit cell parameters of  $a = 10.8623 (\pm 0.0076) \text{ \AA}$ ,  $b = 6.2798 (\pm 0.0043) \text{ \AA}$ ,  $c = 5.1911 (\pm 0.0012) \text{ \AA}$ ,  $V = 354.1 (\pm 0.5) \text{ \AA}^3$ , which overall show smaller uncertainties between observed and calculated  $d$  spacings. For re-indexing the literature data, our high-pressure orthorhombic structural model and the dichotomy method were used to obtain the lattice parameter by minimizing the  $d_{\text{Obs}}-d_{\text{Calc}}$  values in our calculations. Previously proposed monoclinic or orthorhombic structural model was not used here.  $d_{\text{Obs}}$ : observed  $d$  spacings of the X-ray diffraction peaks;  $d_{\text{Calc}}$ : calculated  $d$  spacings;  $d_{\text{Obs}}-d_{\text{Calc}}$ : difference between the observed and calculated  $d$  spacings. The first column of the  $d_{\text{Obs}}-d_{\text{Calc}}$  listed below represents results using our proposed orthorhombic structure for the phase II, while the second column of  $d_{\text{Obs}}-d_{\text{Calc}}$  are results from the literature using their orthorhombic structural model<sup>2</sup>.

| H | K | L | $d_{\text{Obs}}^*$ (Å) | $d_{\text{Calc}}$ (Å) | $d_{\text{Obs}}-d_{\text{Calc}}$ (Å) | $d_{\text{Obs}}-d_{\text{Calc}}^*$ (Å) |
|---|---|---|------------------------|-----------------------|--------------------------------------|----------------------------------------|
| 1 | 0 | 2 | 2.5189                 | 2.5197                | -0.0008                              | 0.0050                                 |
| 3 | 2 | 0 | 2.3677                 | 2.3680                | -0.0003                              | -0.0046                                |
| 2 | 1 | 2 | 2.1919                 | 2.1907                | 0.0012                               | -0.0001                                |
| 3 | 2 | 1 | 2.1611                 | 2.1582                | 0.0028                               | -0.0001                                |
| 1 | 2 | 2 | 1.9646                 | 1.9645                | 0.0001                               | -0.0022                                |
| 4 | 0 | 2 | 1.8728                 | 1.8737                | -0.0009                              | 0.0022                                 |
| 4 | 1 | 2 | 1.7953                 | 1.7954                | -0.0001                              | 0.0003                                 |
| 0 | 1 | 3 | 1.6660                 | 1.6661                | -0.0001                              | -0.0001                                |

\* Obtained from Isshiki *et al.*<sup>2</sup>.

**Table S6.** Observed and calculated  $d$  spacings for the high-pressure phase II of magnesiosiderite [(Mg<sub>0.25</sub>Fe<sub>0.75</sub>)CO<sub>3</sub>] at 80 GPa and 300 K using the experimental data by Boulard *et al.*<sup>3</sup>. The orthorhombic structural model gives the phase II unit cell parameters of  $a = 11.10 (\pm 0.02) \text{ \AA}$ ,  $b = 6.52 (\pm 0.01) \text{ \AA}$ ,  $c = 5.27 (\pm 0.02) \text{ \AA}$ ,  $V = 381.4 (\pm 1.7) \text{ \AA}^3$ . For re-indexing the literature data, our high-pressure orthorhombic structural model and the dichotomy method were used to obtain the lattice parameter by minimizing the  $d_{\text{Obs}}-d_{\text{Calc}}$  values in our calculations. Previously proposed monoclinic or orthorhombic structural model was not used here.  $d_{\text{Obs}}$ : observed  $d$  spacings of the X-ray diffraction peaks;  $d_{\text{Calc}}$ : calculated  $d$  spacings;  $d_{\text{Obs}}-d_{\text{Calc}}$ : difference between the observed and calculated  $d$  spacings. The first column of the  $d_{\text{Obs}}-d_{\text{Calc}}$  listed below represents results using our proposed orthorhombic structure for the phase II, while the second column of  $d_{\text{Obs}}-d_{\text{Calc}}$  are results from the literature using the monoclinic structural model<sup>3</sup>.

| H | K | L | $d_{\text{Obs}}^*$ (Å) | $d_{\text{Calc}}$ (Å) | $d_{\text{Obs}}-d_{\text{Calc}}$ (Å) | $d_{\text{Obs}}-d_{\text{Calc}}^*$ (Å) |
|---|---|---|------------------------|-----------------------|--------------------------------------|----------------------------------------|
| 3 | 0 | 0 | 3.70                   | 3.70                  | 0.00                                 | 0.02                                   |
| 1 | 2 | 0 | 3.15                   | 3.14                  | 0.01                                 | 0.00                                   |
| 0 | 0 | 2 | 2.61                   | 2.63                  | -0.02                                | 0.02                                   |
| 1 | 0 | 2 | 2.57                   | 2.57                  | 0.00                                 | 0.00                                   |
| 1 | 1 | 2 | 2.39                   | 2.39                  | 0.00                                 | 0.04                                   |
| 4 | 1 | 1 | 2.29                   | 2.30                  | -0.01                                | 0.00                                   |
| 2 | 1 | 2 | 2.26                   | 2.24                  | 0.02                                 | 0.00                                   |
| 0 | 3 | 1 | 2.00                   | 2.01                  | -0.01                                | 0.00                                   |
| 2 | 2 | 2 | 1.92                   | 1.92                  | 0.00                                 | -0.01                                  |
| 6 | 0 | 0 | 1.85                   | 1.85                  | 0.00                                 | 0.00                                   |
| 4 | 1 | 2 | 1.83                   | 1.83                  | 0.00                                 | 0.00                                   |
| 0 | 0 | 3 | 1.76                   | 1.76                  | 0.00                                 | 0.00                                   |
| 6 | 1 | 1 | 1.69                   | 1.69                  | 0.00                                 | -0.01                                  |
| 0 | 3 | 2 | 1.67                   | 1.67                  | 0.00                                 | 0.00                                   |

\* Obtained from Boulard *et al.*<sup>3</sup>.

**Table S7.** Lattice parameters of siderite II at high pressures and ambient temperature.

| P (GPa)                    | <i>a</i> (Å)      | <i>b</i> (Å)     | <i>c</i> (Å)     | <i>V</i> (Å <sup>3</sup> ) |
|----------------------------|-------------------|------------------|------------------|----------------------------|
| 66.6 (±1.2)                | 11.1483 (±0.0048) | 6.4317 (±0.0021) | 5.3484 (±0.0028) | 383.5 (±0.3)               |
| 69.8 (±1.5)                | 11.1183 (±0.0068) | 6.4144 (±0.0025) | 5.3341 (±0.0023) | 380.4 (±0.3)               |
| 72.3 (±1.5)                | 11.1068 (±0.0055) | 6.4078 (±0.0031) | 5.3285 (±0.0017) | 379.2 (±0.3)               |
| 78.2 (±1.6)                | 11.0799 (±0.0039) | 6.3923 (±0.0024) | 5.3156 (±0.0037) | 376.5 (±0.3)               |
| 80.7 (±1.4)                | 11.0490 (±0.0057) | 6.3744 (±0.0036) | 5.3008 (±0.0030) | 373.3 (±0.4)               |
| 85.4 (±1.9)                | 11.0102 (±0.0058) | 6.3520 (±0.0043) | 5.2822 (±0.0025) | 369.4 (±0.4)               |
| 89.8 (±1.7)                | 10.9902 (±0.0028) | 6.3405 (±0.0021) | 5.2726 (±0.0009) | 367.4 (±0.2)               |
| 86.3 (±1.9)                | 11.0002 (±0.0078) | 6.3463 (±0.0041) | 5.2774 (±0.0038) | 368.4 (±0.4)               |
| 83.2 (±2.1) <sup>d</sup>   | 11.0020 (±0.0051) | 6.3473 (±0.0032) | 5.2783 (±0.0022) | 368.6 (±0.3)               |
| 78.9 (±1.7) <sup>d</sup>   | 11.0171 (±0.0092) | 6.3560 (±0.0055) | 5.2855 (±0.0036) | 370.1 (±0.5)               |
| 76.2 (±1.6) <sup>d</sup>   | 11.0403 (±0.0091) | 6.3694 (±0.0031) | 5.2966 (±0.0027) | 372.5 (±0.4)               |
| 73.8 (±1.7) <sup>d</sup>   | 11.0557 (±0.0089) | 6.3783 (±0.0041) | 5.3040 (±0.0032) | 374.0 (±0.4)               |
| 69.5 (±1.5) <sup>d</sup>   | 11.0737 (±0.0088) | 6.3887 (±0.0061) | 5.3127 (±0.0034) | 375.8 (±0.5)               |
| 63.5 (±1.4) <sup>d</sup>   | 11.1573 (±0.0104) | 6.4369 (±0.0065) | 5.3528 (±0.0044) | 384.4 (±0.6)               |
| 59.2 (±1.8) <sup>d</sup>   | 11.4063 (±0.0095) | 6.4824 (±0.0053) | 5.3906 (±0.0033) | 398.6 (±0.5)               |
| 57.5 (±1.6) <sup>d</sup>   | 11.4616 (±0.0115) | 6.5138 (±0.0069) | 5.4167 (±0.0046) | 404.4 (±0.7)               |
| 53.3 (±1.9) <sup>d</sup>   | 11.5339 (±0.0099) | 6.5548 (±0.0052) | 5.4508 (±0.0044) | 412.1 (±0.6)               |
| 49.5 (±1.6) <sup>d</sup>   | 11.5759 (±0.0125) | 6.5787 (±0.0059) | 5.4707 (±0.0056) | 416.6 (±0.7)               |
| 46.7 (±1.8) <sup>d</sup>   | 11.6081 (±0.0131) | 6.5970 (±0.0071) | 5.4859 (±0.0042) | 420.1 (±0.7)               |
| 42.0 (±1.6) <sup>d</sup>   | 11.6714 (±0.0114) | 6.6330 (±0.0062) | 5.5158 (±0.0055) | 427.0 (±0.7)               |
| 40.4 (±1.5) <sup>d</sup>   | 11.7083 (±0.0146) | 6.6540 (±0.0083) | 5.5333 (±0.0046) | 431.1 (±0.8)               |
| 37.6 (±1.5) <sup>d</sup>   | 11.7158 (±0.0128) | 6.6582 (±0.0088) | 5.5368 (±0.0052) | 431.9 (±0.8)               |
| 34.2 (±1.7) <sup>d</sup>   | 11.7346 (±0.0165) | 6.6689 (±0.0075) | 5.5457 (±0.0079) | 434.0 (±1.0)               |
| 30.3 (±1.2) <sup>d</sup>   | 11.7682 (±0.0155) | 6.6880 (±0.0096) | 5.5616 (±0.0055) | 437.7 (±1.0)               |
| 28.2 (±1.3) <sup>d</sup>   | 11.7797 (±0.0176) | 6.6945 (±0.0085) | 5.5670 (±0.0039) | 439.0 (±0.9)               |
| 25.9 (±1.5) <sup>d</sup>   | 11.8321 (±0.0215) | 6.7243 (±0.0106) | 5.5918 (±0.0121) | 444.9 (±1.4)               |
| 20.9 (±1.1) <sup>d</sup>   | 11.8796 (±0.0177) | 6.7513 (±0.0089) | 5.6142 (±0.0075) | 450.3 (±1.1)               |
| 17.1 (±0.8) <sup>d</sup>   | 11.9344 (±0.0236) | 6.7825 (±0.0091) | 5.6401 (±0.0099) | 456.5 (±1.4)               |
| 14.5 (±0.9) <sup>d</sup>   | 11.9982 (±0.0258) | 6.8187 (±0.0112) | 5.6703 (±0.0125) | 463.9 (±1.6)               |
| 51.0 (±1.6)*               | 11.5508 (±0.0085) | 6.5645 (±0.0039) | 5.4588 (±0.0049) | 413.9 (±0.5)               |
| 56.7 (±1.5)*               | 11.4987 (±0.0095) | 6.5349 (±0.0059) | 5.4342 (±0.0064) | 408.3 (±0.7)               |
| 94.0 (±1.9)*               | 10.9552 (±0.0103) | 6.3203 (±0.0064) | 5.2558 (±0.0055) | 363.9 (±0.6)               |
| 98.5 (±1.8)*               | 10.9515 (±0.0099) | 6.3182 (±0.0059) | 5.2540 (±0.0066) | 363.5 (±0.7)               |
| 104.0 (±2.2)*              | 10.9105 (±0.0115) | 6.2945 (±0.0069) | 5.2344 (±0.0067) | 359.5 (±0.7)               |
| 108.9 (±2.1)*              | 10.8918 (±0.0169) | 6.2837 (±0.0097) | 5.2254 (±0.0075) | 357.6 (±0.9)               |
| 114.8 (±2.4)*              | 10.8400 (±0.0156) | 6.2538 (±0.0089) | 5.2005 (±0.0061) | 352.5 (±0.8)               |
| 119.5 (±2.7)*              | 10.8188 (±0.0175) | 6.2416 (±0.0095) | 5.1904 (±0.0055) | 350.5 (±0.9)               |
| 111.8 (±3.1)* <sup>d</sup> | 10.8474 (±0.0217) | 6.2581 (±0.0114) | 5.2041 (±0.0103) | 353.3 (±1.2)               |
| 106.1 (±2.5)* <sup>d</sup> | 10.8902 (±0.0208) | 6.2828 (±0.0098) | 5.2246 (±0.0091) | 357.5 (±1.1)               |
| 96.9 (±2.5)* <sup>d</sup>  | 10.9351 (±0.0225) | 6.3087 (±0.0117) | 5.2462 (±0.0089) | 361.9 (±1.2)               |

\* NaCl-B2 used as pressure medium.

<sup>d</sup> Decompression.

**Table S8.** Equation of state parameters of siderite I and II at high pressures and 300 K.  $V_0$ : unit cell volume at zero pressure;  $K_{OT}$ : isothermal bulk modulus;  $K_{OT}'$ : pressure derivative of the  $K_{OT}$ . In the Birch-Murnaghan EoS fitting,  $V_0$  and  $K_{OT}$  have been set as free parameters for both phases.  $K_{OT}'$  was set as a free parameter for the siderite I. The EoS parameters for siderite II were derived from having  $K_{OT}'$  fixed at 4 or set as a free parameter, respectively. Due to the limited pressure range for the siderite II data, the derived  $K_{OT}'$  carries a relatively large uncertainty.

|                          | Siderite I          |                   | Siderite II       |                     |                   |                     |
|--------------------------|---------------------|-------------------|-------------------|---------------------|-------------------|---------------------|
|                          | HS                  | LS                | HS                | HS*                 | LS                | LS*                 |
| $V_0$ ( $\text{\AA}^3$ ) | 292.9 ( $\pm 0.1$ ) | 261 ( $\pm 3$ )   | 484 ( $\pm 9$ )   | 489.8 ( $\pm 2.4$ ) | 453 ( $\pm 8$ )   | 459.6 ( $\pm 3.5$ ) |
| $K_{OT}$ (GPa)           | 112 ( $\pm 2$ )     | 131 ( $\pm 5$ )   | 211 ( $\pm 21$ )  | 222 ( $\pm 13$ )    | 234 ( $\pm 24$ )  | 251 ( $\pm 17$ )    |
| $K_{OT}'$                | 5.2 ( $\pm 0.2$ )   | 5.3 ( $\pm 0.2$ ) | 4.6 ( $\pm 0.4$ ) | 4                   | 4.9 ( $\pm 0.4$ ) | 4                   |

\*  $K_{OT}'$  fixed at 4.

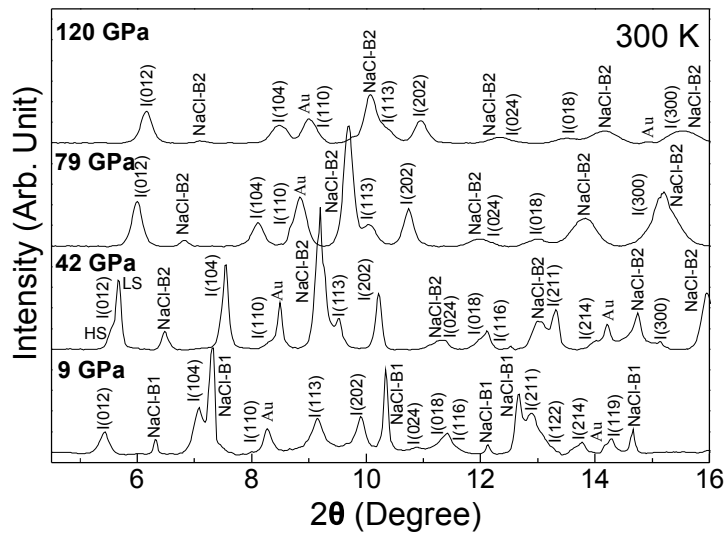

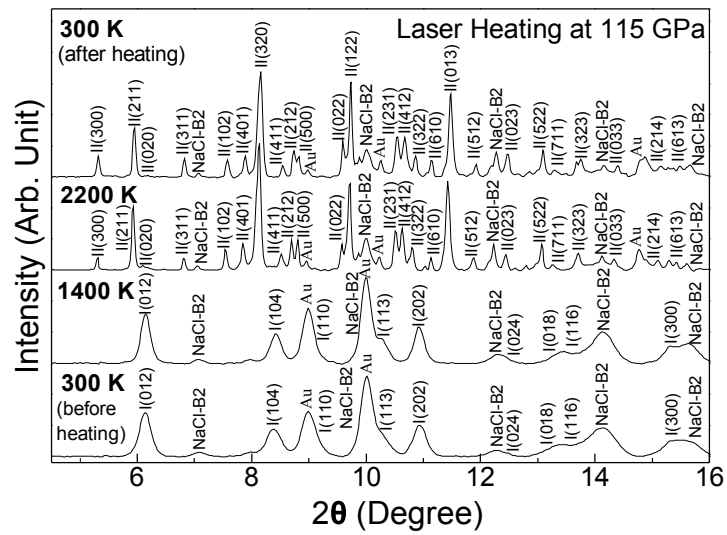



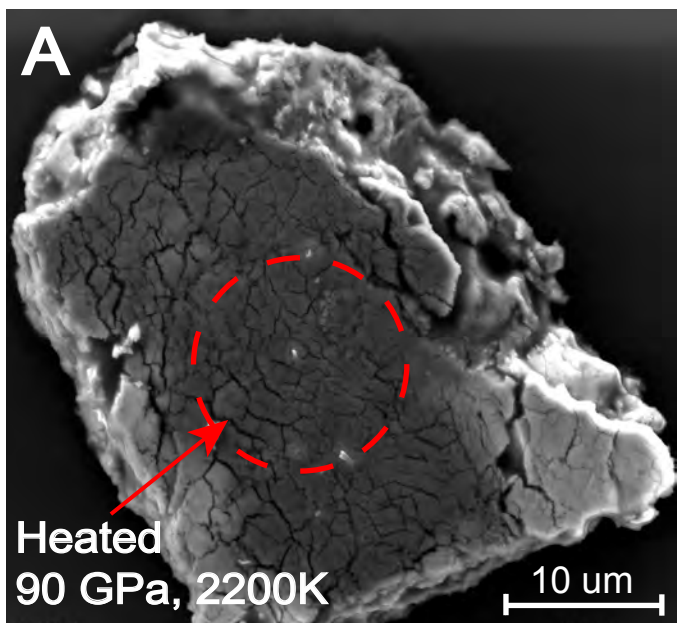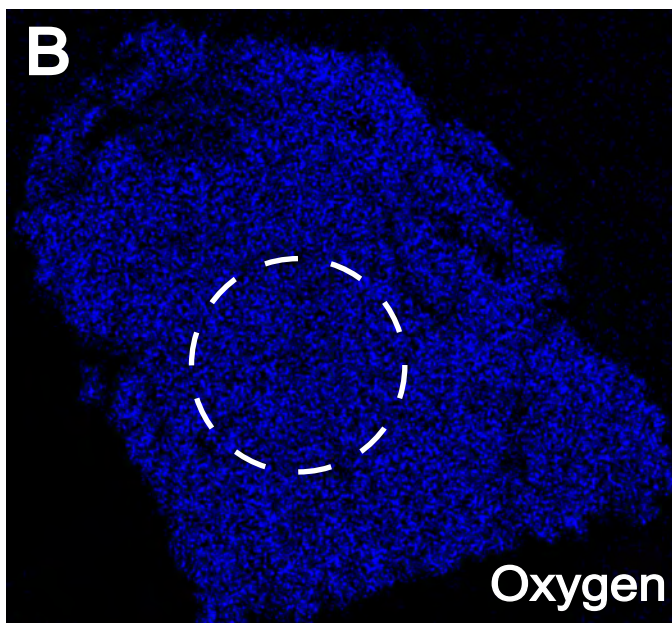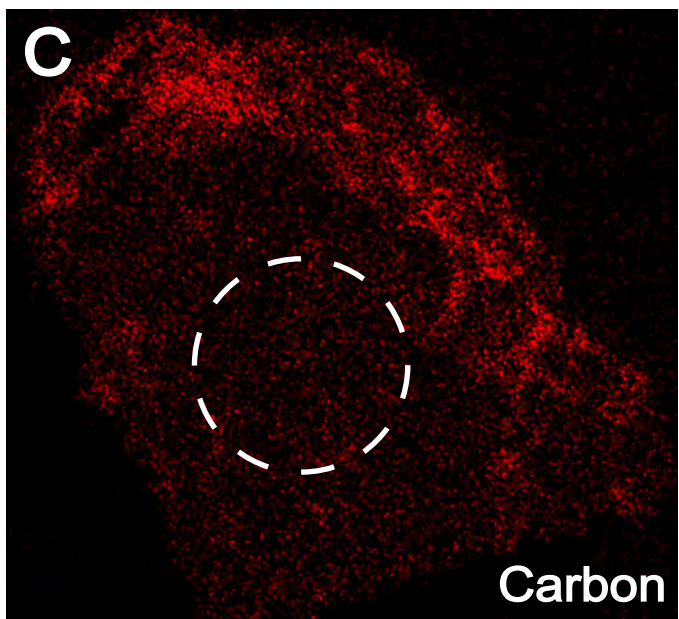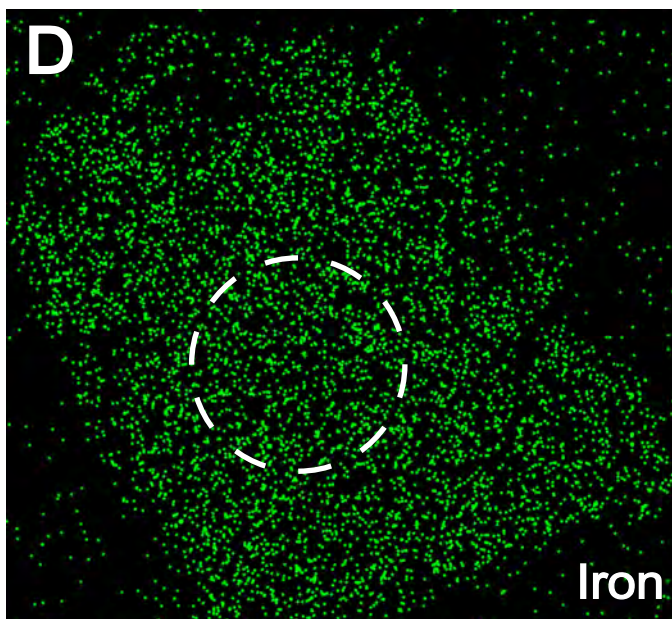

Supplement: srep07640-s1.pdf [file srep07640-s1.pdf]
